# Supplementary material
Source: Copernicus journal article supplement (doi:10.5194/essd-2026-453)
Supplement: Supplementary file 1 [file essd-2026-453-supplement.pdf]

*Supplement of*

**The first consistent global gap-free daily 4 km dataset of particulate organic carbon, particulate organic nitrogen and their ratio (1998–2023)**

Yu Zhang et al.

Correspondence to: Huizeng Liu ([huizeng.liu@szu.edu.cn](mailto:huizeng.liu@szu.edu.cn))

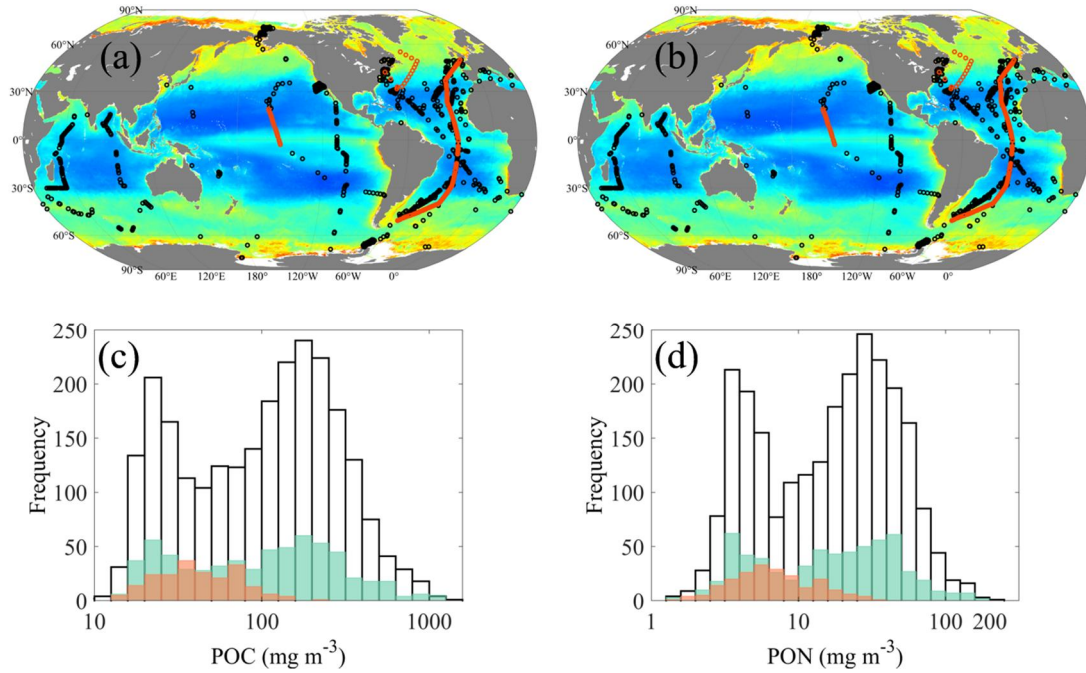

Figure S1. Geographical distributions of synchronous matchups between in-situ POC and PON measurements and OCCI satellite data (a-b); distribution histograms of the matched in-situ POC and PON concentrations (c-d).

Table S1 Statistical Summary of POC and PON Concentrations in the Matchup Dataset.

| Parameters | Dataset    | N    | Min   | Max     | Mean   | Median | Std.   |
|------------|------------|------|-------|---------|--------|--------|--------|
| POC        | Whole      | 3110 | 9.36  | 1377.96 | 156.69 | 113.13 | 161.36 |
|            | Training   | 2488 | 9.36  | 1377.96 | 155.97 | 113.98 | 157.21 |
|            | Validation | 622  | 13.42 | 1191.86 | 159.60 | 108.56 | 177.10 |
| PON        | Whole      | 3118 | 1.44  | 175.56  | 25.25  | 18.59  | 24.58  |
|            | Training   | 2494 | 1.44  | 202.26  | 25.25  | 18.94  | 24.15  |
|            | Validation | 624  | 1.50  | 175.56  | 25.25  | 16.89  | 26.26  |

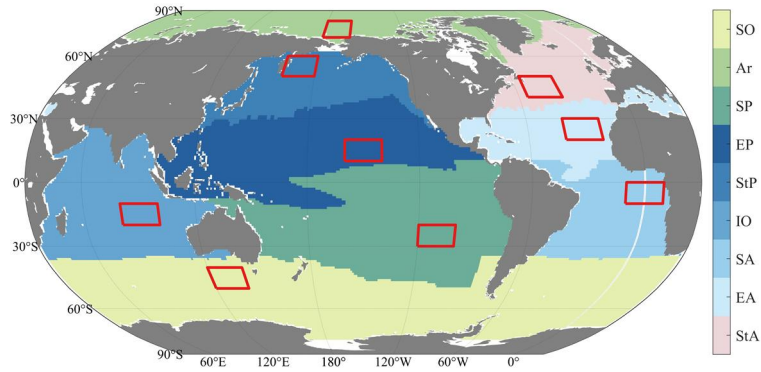

Figure S2. Map of RECCAP2-ocean regions, including the Southern Ocean (SO), Arctic (Ar), South Pacific (SP), equatorial Pacific (EP), subtropical Pacific (StP), Indian Ocean (IO), South Atlantic (SA), equatorial Atlantic (EA), and subtropical Atlantic (StA). The red diamond-shaped area indicates the randomly selected region for reconstruction method evaluation.

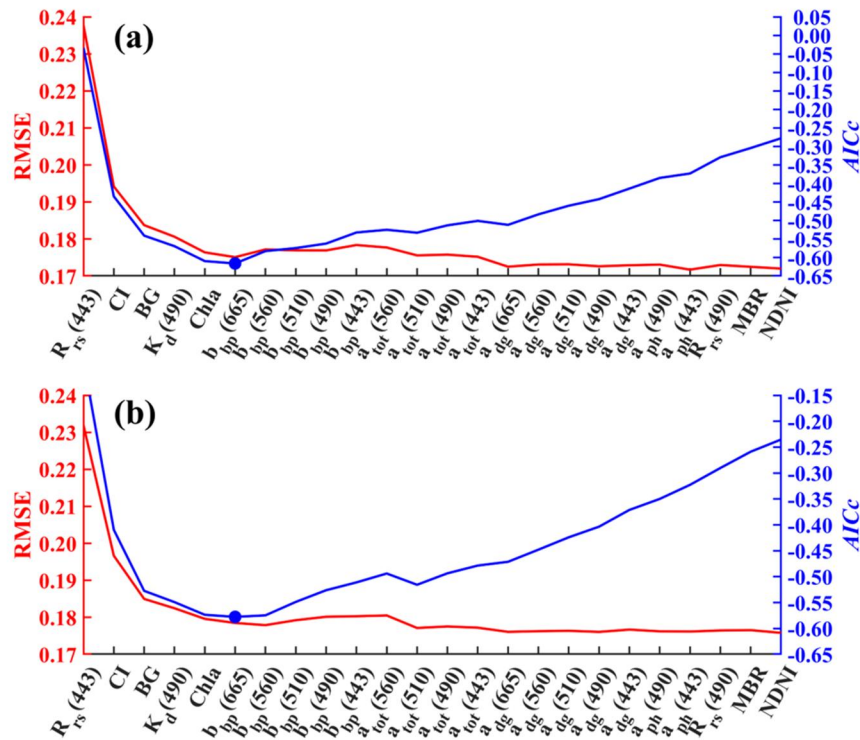

Figure S3. Variations in the RMSE and  $AICc$  with the number of selected features in GPR POC (a) and PON (b) modeling. The features are ranked based on their importance.

Table S2 Statistical descriptions of DCT-PLS, DINEOF, and DINCAE performance for reconstructing POC and PON in the nine selected regions across the global ocean.

| Region | Method  | Parameter | January 1st |       |      |        |       |           | July 1st |       |      |       |       |           |
|--------|---------|-----------|-------------|-------|------|--------|-------|-----------|----------|-------|------|-------|-------|-----------|
|        |         |           | N           | $R^2$ | RMSE | MAPE   | Slope | Intercept | N        | $R^2$ | RMSE | MAPE  | Slope | Intercept |
| StP    | DCT-PLS | POC       | 121         | 0.52  | 1.24 | 3.42%  | 0.78  | 0.42      | 869      | 0.99  | 1.06 | 0.69% | 0.97  | 0.07      |
|        |         | PON       | 121         | 0.55  | 1.25 | 6.22%  | 0.79  | 0.24      | 869      | 0.98  | 1.06 | 1.08% | 0.98  | 0.03      |
|        | DINEOF  | POC       | 61          | 0.002 | 1.49 | 6.88%  | 1.09  | -0.20     | 865      | 0.79  | 1.25 | 2.74% | 0.85  | 0.33      |
|        |         | PON       | 56          | 0.10  | 1.47 | 10.74% | 1.02  | -0.08     | 864      | 0.79  | 1.23 | 3.97% | 0.89  | 0.16      |
|        | DINCAE  | POC       | 15          | 0.08  | 1.52 | 6.83%  | 0.76  | 0.43      | 850      | 0.85  | 1.21 | 2.48% | 0.82  | 0.40      |
|        |         | PON       | 20          | 0.06  | 1.53 | 12.72% | 0.90  | 0.08      | 851      | 0.87  | 1.18 | 3.36% | 0.86  | 0.20      |
| EP     | DCT-PLS | POC       | 3942        | 0.96  | 1.01 | 0.32%  | 0.97  | 0.04      | 5746     | 0.97  | 1.01 | 0.29% | 0.96  | 0.05      |
|        |         | PON       | 3942        | 0.95  | 1.02 | 1.03%  | 0.97  | 0.01      | 5746     | 0.97  | 1.02 | 1.05% | 0.97  | 0.02      |
|        | DINEOF  | POC       | 3942        | 0.59  | 1.05 | 1.19%  | 0.91  | 0.13      | 5746     | 0.51  | 1.06 | 1.50% | 0.90  | 0.13      |
|        |         | PON       | 3942        | 0.63  | 1.05 | 3.28%  | 0.98  | 0.01      | 5746     | 0.60  | 1.07 | 4.35% | 0.97  | 0.02      |
|        | DINCAE  | POC       | 3942        | 0.64  | 1.05 | 1.13%  | 0.69  | 0.42      | 5746     | 0.57  | 1.06 | 1.42% | 0.66  | 0.47      |
|        |         | PON       | 3942        | 0.62  | 1.05 | 3.28%  | 0.78  | 0.12      | 5746     | 0.79  | 1.05 | 3.00% | 0.83  | 0.09      |
| SP     | DCT-PLS | POC       | 5115        | 0.96  | 1.03 | 0.72%  | 0.99  | 0.02      | 2895     | 0.91  | 1.02 | 0.36% | 0.95  | 0.07      |
|        |         | PON       | 5115        | 0.97  | 1.03 | 1.95%  | 0.99  | 0.004     | 2895     | 0.91  | 1.02 | 1.12% | 0.95  | 0.03      |
|        | DINEOF  | POC       | 5115        | 0.87  | 1.07 | 1.62%  | 0.97  | 0.04      | 2895     | 0.44  | 1.04 | 1.08% | 0.99  | 0.01      |
|        |         | PON       | 5115        | 0.88  | 1.07 | 4.48%  | 0.99  | 0.0005    | 2895     | 0.42  | 1.06 | 3.43% | 0.87  | 0.08      |
|        | DINCAE  | POC       | 5115        | 0.90  | 1.06 | 1.42%  | 0.90  | 0.13      | 2895     | 0.46  | 1.04 | 0.99% | 0.85  | 0.20      |
|        |         | PON       | 5115        | 0.87  | 1.07 | 4.74%  | 0.87  | 0.06      | 2895     | 0.54  | 1.05 | 2.99% | 0.82  | 0.10      |
| IO     | DCT-PLS | POC       | 5082        | 0.96  | 1.02 | 0.45%  | 0.97  | 0.05      | 2794     | 0.93  | 1.04 | 0.60% | 0.96  | 0.06      |
|        |         | PON       | 5082        | 0.96  | 1.03 | 1.25%  | 0.97  | 0.01      | 2794     | 0.93  | 1.03 | 1.42% | 0.98  | 0.01      |
|        | DINEOF  | POC       | 5082        | 0.67  | 1.07 | 1.64%  | 0.96  | 0.06      | 2794     | 0.56  | 1.10 | 2.06% | 0.95  | 0.07      |
|        |         | PON       | 5082        | 0.69  | 1.08 | 4.24%  | 0.97  | 0.01      | 2794     | 0.57  | 1.08 | 4.05% | 0.98  | 0.01      |
|        | DINCAE  | POC       | 5082        | 0.78  | 1.06 | 1.35%  | 0.70  | 0.42      | 2794     | 0.83  | 1.06 | 1.29% | 0.75  | 0.35      |
|        |         | PON       | 5082        | 0.83  | 1.06 | 3.12%  | 0.81  | 0.10      | 2793     | 0.63  | 1.08 | 3.80% | 0.68  | 0.20      |
| StA    | DCT-PLS | POC       | 1475        | 0.91  | 1.11 | 1.68%  | 0.93  | 0.14      | 2286     | 0.99  | 1.06 | 0.92% | 0.99  | 0.02      |
|        |         | PON       | 1475        | 0.89  | 1.11 | 2.74%  | 0.91  | 0.10      | 2286     | 0.98  | 1.06 | 1.77% | 0.99  | 0.01      |

|    |         |     |      |      |      |       |      |        |      |      |      |        |      |       |
|----|---------|-----|------|------|------|-------|------|--------|------|------|------|--------|------|-------|
|    |         | POC | 1307 | 0.47 | 1.31 | 4.51% | 0.91 | 0.19   | 2285 | 0.92 | 1.15 | 2.66%  | 0.99 | 0.03  |
|    | DINEOF  | PON | 1294 | 0.38 | 1.31 | 7.74% | 0.88 | 0.15   | 2285 | 0.90 | 1.16 | 4.96%  | 1.01 | 0.002 |
|    |         | POC | 860  | 0.60 | 1.27 | 4.19% | 1.07 | -0.12  | 2282 | 0.92 | 1.14 | 2.55%  | 0.95 | 0.09  |
|    | DINCAE  | PON | 885  | 0.42 | 1.32 | 8.07% | 1.02 | 0.01   | 2281 | 0.91 | 1.15 | 4.98%  | 0.93 | 0.08  |
|    |         | POC | 4023 | 0.96 | 1.03 | 0.54% | 0.97 | 0.04   | 3693 | 0.97 | 1.04 | 0.46%  | 0.98 | 0.03  |
|    | DCT-PLS | PON | 4023 | 0.95 | 1.05 | 1.57% | 0.98 | 0.02   | 3693 | 0.97 | 1.03 | 1.03%  | 0.99 | 0.01  |
|    |         | POC | 4023 | 0.74 | 1.09 | 1.56% | 0.98 | 0.03   | 3691 | 0.83 | 1.09 | 1.68%  | 0.95 | 0.07  |
| EA | DINEOF  | PON | 4023 | 0.69 | 1.12 | 4.40% | 1.04 | -0.03  | 3693 | 0.80 | 1.09 | 3.78%  | 0.91 | 0.05  |
|    |         | POC | 4023 | 0.74 | 1.09 | 1.61% | 1.01 | -0.005 | 3681 | 0.77 | 1.11 | 2.06%  | 1.03 | -0.04 |
|    | DINCAE  | PON | 4023 | 0.76 | 1.10 | 3.90% | 0.99 | 0.01   | 3686 | 0.73 | 1.10 | 4.36%  | 0.98 | 0.01  |
|    |         | POC | 4701 | 0.96 | 1.07 | 1.00% | 0.98 | 0.03   | 6567 | 0.99 | 1.06 | 0.90%  | 0.99 | 0.03  |
|    | DCT-PLS | PON | 4701 | 0.96 | 1.07 | 2.05% | 0.98 | 0.02   | 6567 | 0.99 | 1.06 | 1.43%  | 0.99 | 0.01  |
|    |         | POC | 4698 | 0.76 | 1.18 | 2.74% | 0.93 | 0.11   | 6567 | 0.85 | 1.25 | 3.44%  | 0.95 | 0.08  |
| SA | DINEOF  | PON | 4699 | 0.76 | 1.18 | 5.60% | 0.89 | 0.10   | 6567 | 0.87 | 1.22 | 5.41%  | 0.98 | 0.02  |
|    |         | POC | 4695 | 0.88 | 1.13 | 2.17% | 0.89 | 0.18   | 6557 | 0.95 | 1.15 | 2.30%  | 0.92 | 0.15  |
|    | DINCAE  | PON | 4699 | 0.88 | 1.13 | 4.35% | 0.87 | 0.10   | 6561 | 0.95 | 1.14 | 3.71%  | 0.93 | 0.07  |
|    |         | POC | 2090 | 0.97 | 1.07 | 0.96% | 0.97 | 0.06   | 106  | 0.80 | 1.09 | 1.50%  | 0.89 | 0.20  |
|    | DCT-PLS | PON | 2090 | 0.97 | 1.07 | 1.41% | 0.98 | 0.03   | 106  | 0.75 | 1.11 | 2.99%  | 0.84 | 0.18  |
|    |         | POC | 2090 | 0.83 | 1.18 | 2.67% | 0.87 | 0.26   | 101  | 0.21 | 1.20 | 3.35%  | 0.63 | 0.66  |
| SO | DINEOF  | PON | 2090 | 0.85 | 1.17 | 3.90% | 0.89 | 0.14   | 102  | 0.13 | 1.25 | 6.32%  | 0.88 | 0.14  |
|    |         | POC | 2090 | 0.86 | 1.16 | 2.37% | 0.92 | 0.17   | 71   | 0.30 | 1.18 | 2.92%  | 0.64 | 0.64  |
|    | DINCAE  | PON | 2090 | 0.86 | 1.16 | 3.60% | 0.92 | 0.12   | 106  | 0.01 | 3.84 | 51.84% | 0.22 | 0.29  |
|    |         | POC | \    | \    | \    | \     | \    | \      | 810  | 0.97 | 1.08 | 0.73%  | 0.97 | 0.07  |
|    | DCT-PLS | PON | \    | \    | \    | \     | \    | \      | 810  | 0.97 | 1.08 | 1.16%  | 0.97 | 0.05  |
|    |         | POC | \    | \    | \    | \     | \    | \      | 805  | 0.64 | 1.30 | 3.42%  | 0.82 | 0.39  |
| Ar | DINEOF  | PON | \    | \    | \    | \     | \    | \      | 807  | 0.66 | 1.32 | 5.36%  | 0.77 | 0.33  |
|    |         | POC | \    | \    | \    | \     | \    | \      | 787  | 0.79 | 1.23 | 2.68%  | 0.80 | 0.43  |
|    | DINCAE  | PON | \    | \    | \    | \     | \    | \      | 784  | 0.80 | 1.23 | 3.93%  | 0.80 | 0.28  |

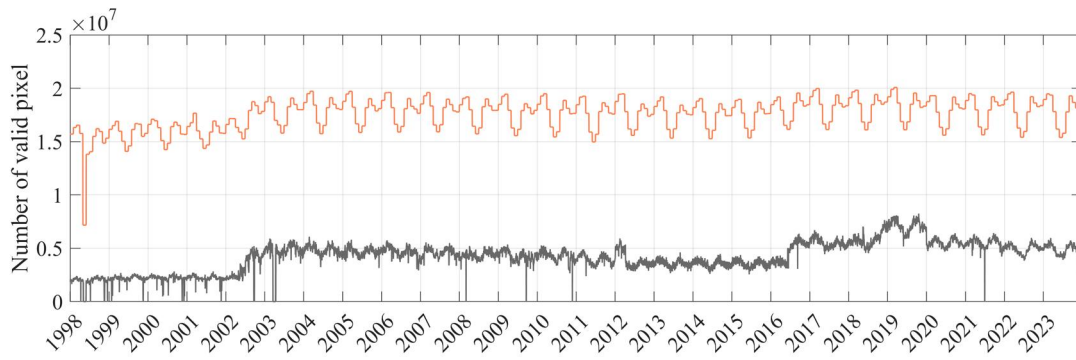

Figure S4. Comparison of the number of valid pixels between the reconstructed and original POC and PON datasets for each day.

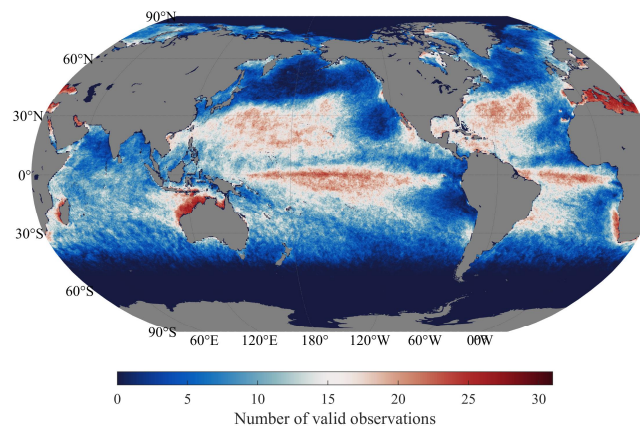

Figure S5. Spatial distribution of monthly mean number of valid observations for POC, PON, and POC:PON during July 2020.
